# Supplementary material
Source: PubMed Central journal article supplement (PMC8286339)
Supplement: NIHMS1718612-supplement-SI.pdf [file NIHMS1718612-supplement-SI.pdf]

## Supporting Information

### **Chemoproteomic study uncovers HemK2/KMT9 as a new target for NTMT1 bisubstrate inhibitors**

Dongxing Chen<sup>†</sup>, Ying Meng<sup>†</sup>, Dan Yu<sup>‡</sup>, Nicholas Noinaj<sup>§</sup>, Xiaodong Cheng<sup>‡</sup>, and Rong Huang<sup>\*,†</sup>

<sup>†</sup>Department of Medicinal Chemistry and Molecular Pharmacology, Purdue Institute for Drug Discovery, Purdue University Center for Cancer Research, Purdue University, West Lafayette, Indiana 47907, United States

<sup>§</sup>Department of Biological Sciences, Markey Center for Structural Biology, and the Purdue Institute of Inflammation, Immunology and Infectious Disease, Purdue University, West Lafayette, Indiana 47907, United States

<sup>‡</sup> Department of Epigenetics and Molecular Carcinogenesis, University of Texas M.D. Anderson Cancer Center, Houston, Texas 77030, United States

Corresponding Author \* [huang-r@purdue.edu](mailto:huang-r@purdue.edu)

## Table of Contents

- A. MS and HPLC analysis of compounds **1-6**
- B. Figure S1. IC<sub>50</sub> curves for compounds **1** (A) and **5** (B), respectively
- C. Figure S2. Pull-down studies with recombinant NTMT1 and HemK2-Trm112 complex from immobilized probe **6**
- D. Table S1. Proteomic analysis of HeLa cell proteomics enriched by probe **6** through LC-MS/MS.
- E. Table S2. Crystallography data and refinement statistics (PDB ID: 6PVA).

## MS and HPLC analysis of compounds 1-6

### MALDI-MS and HPLC spectra of compound 1

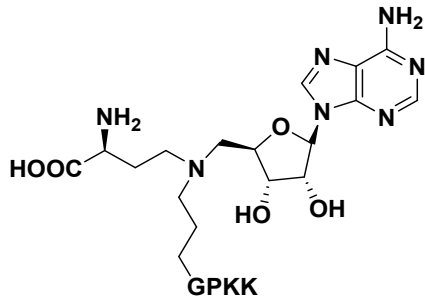

### MALDI-MS spectra of compound 1

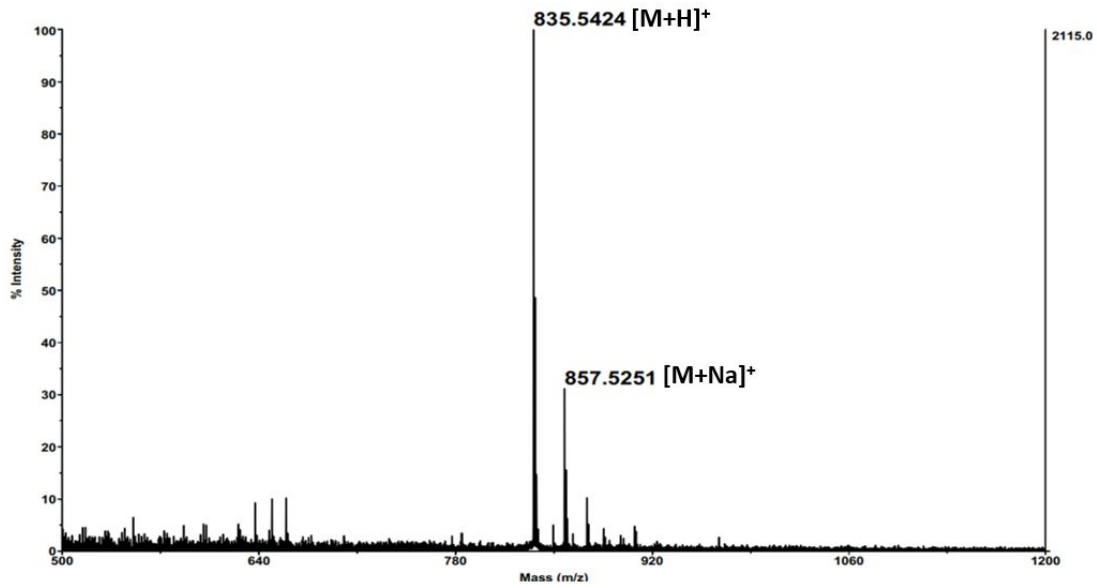

### HPLC spectra of compound 1

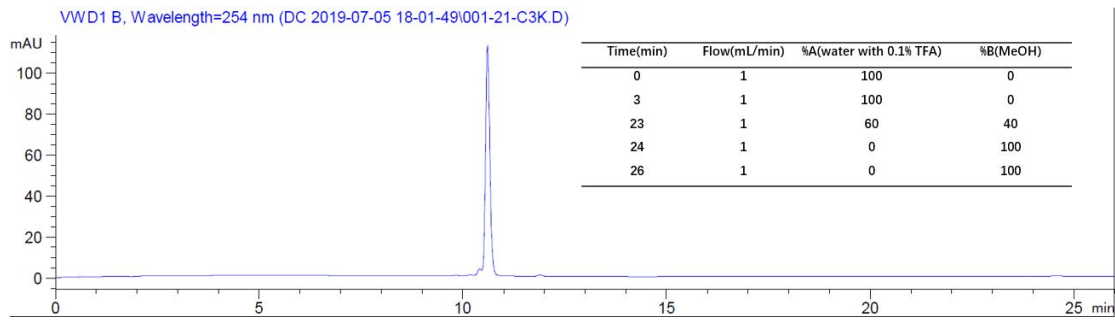

MALDI-MS and LC-MS spectra of compound **2**

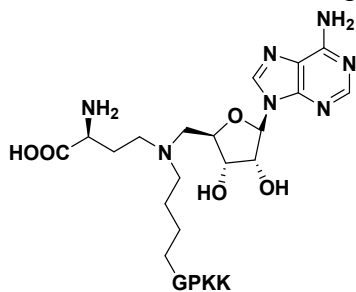

MALDI-MS spectra of compound **2**

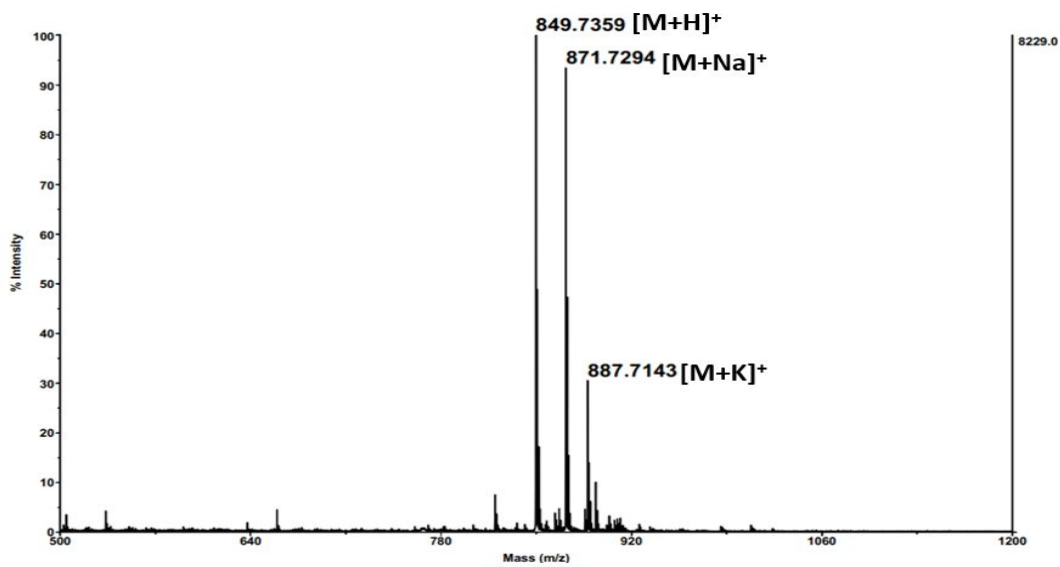

HPLC spectra of compound **2**

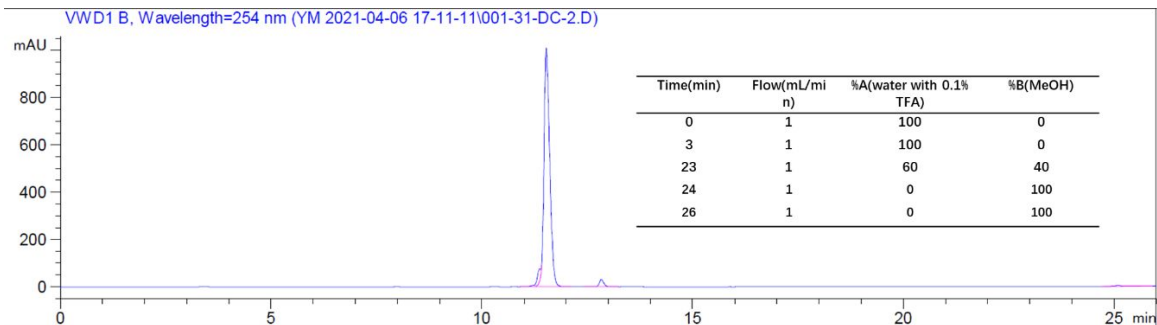

MALDI-MS and LC-MS spectra of compound **3**

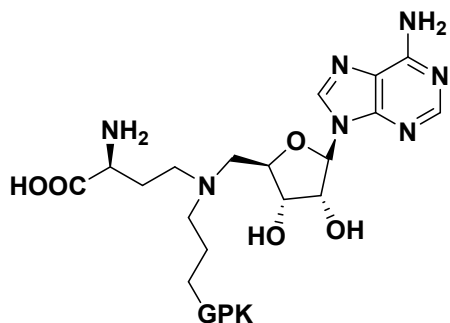

MALDI-MS spectra of compound **3**

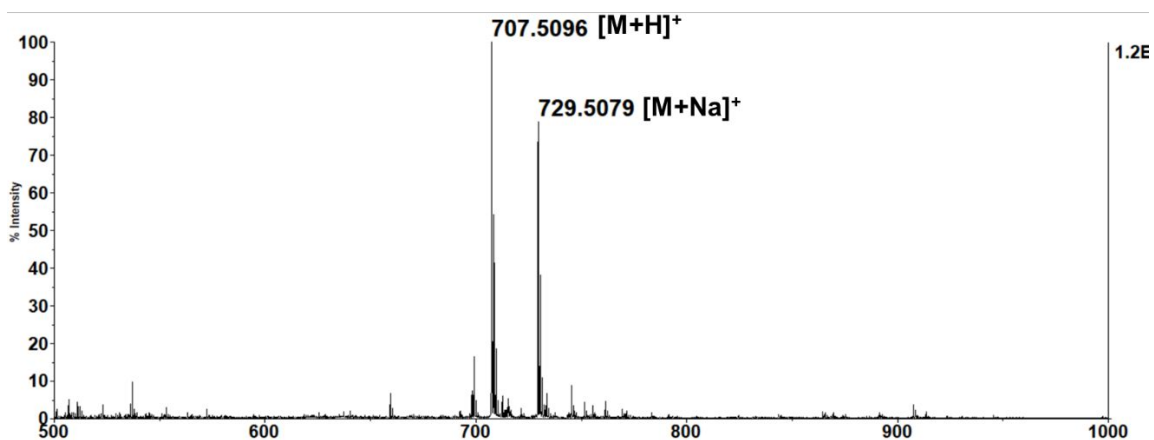

HPLC spectra of compound **3**

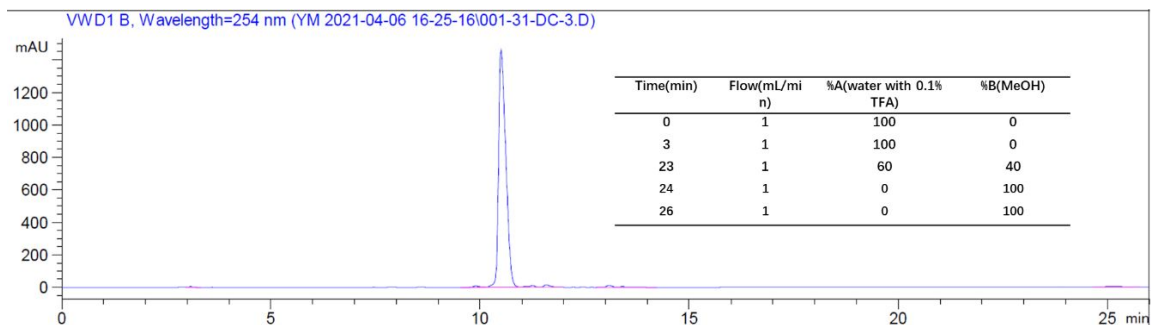

MALDI-MS and HPLC spectra of compound **4**

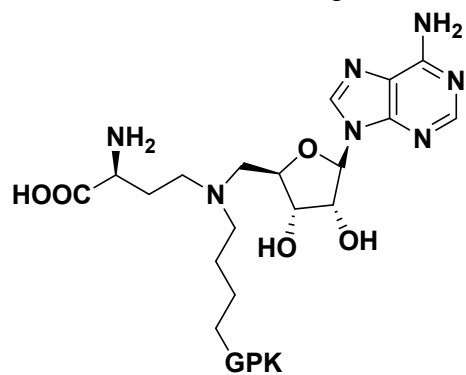

MALDI-MS spectra of compound **4**

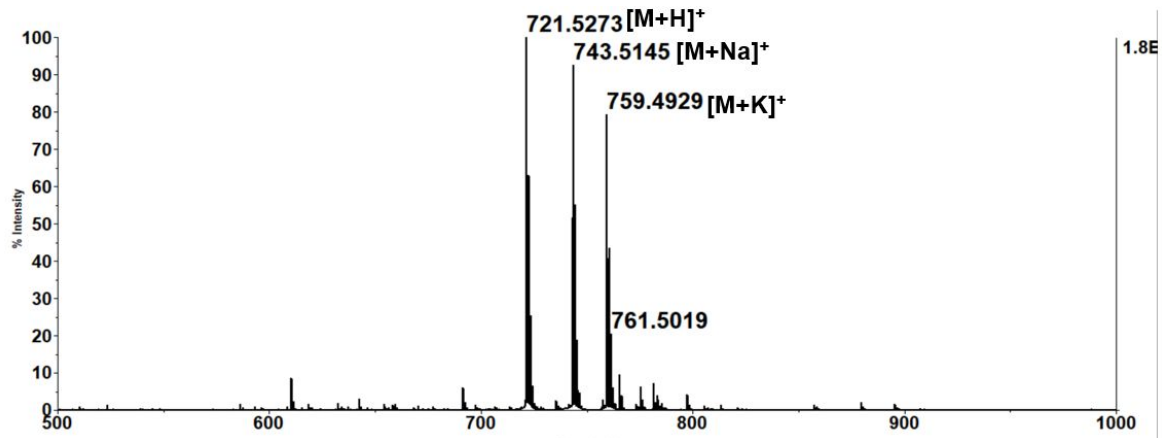

HPLC spectra of compound 4

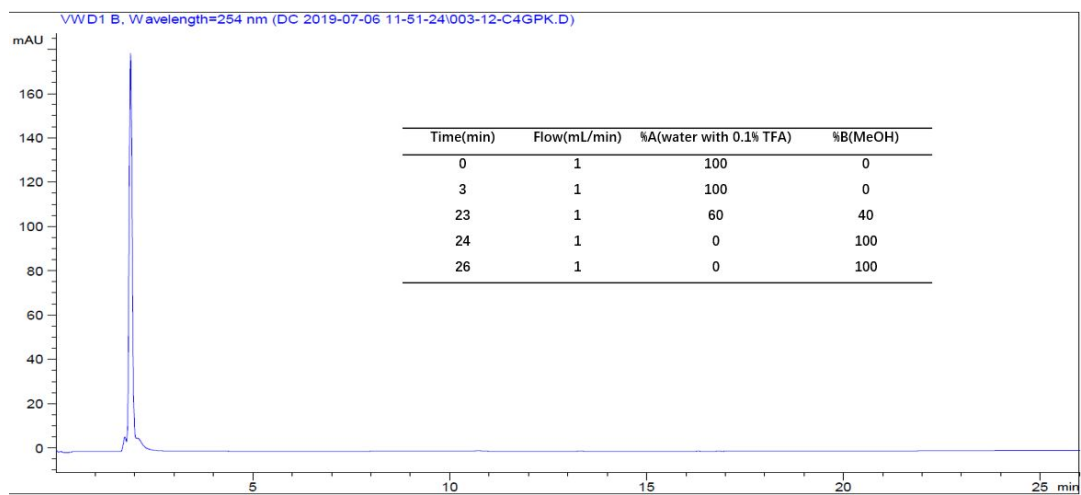

MALDI-MS and HPLC spectra of compound 5

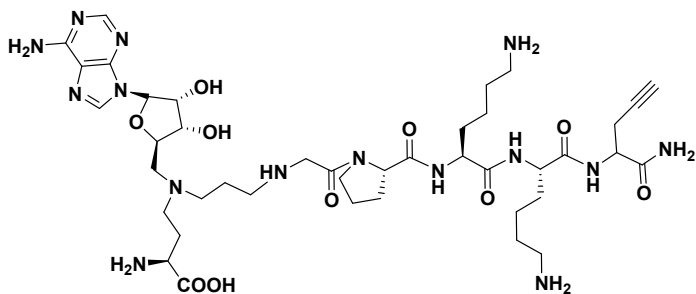

## MALDI-MS spectra of compound 5

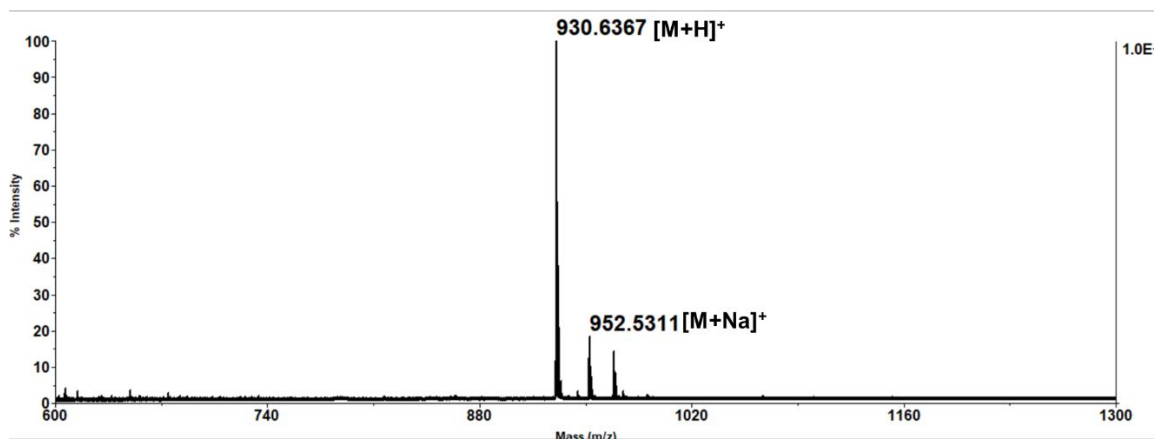

## HPLC spectra of compound 5

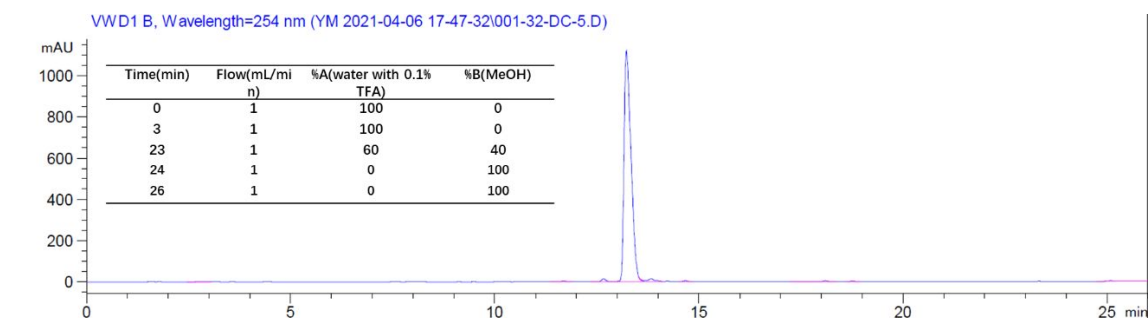

## MALDI-MS and HPLC spectra of compound 6

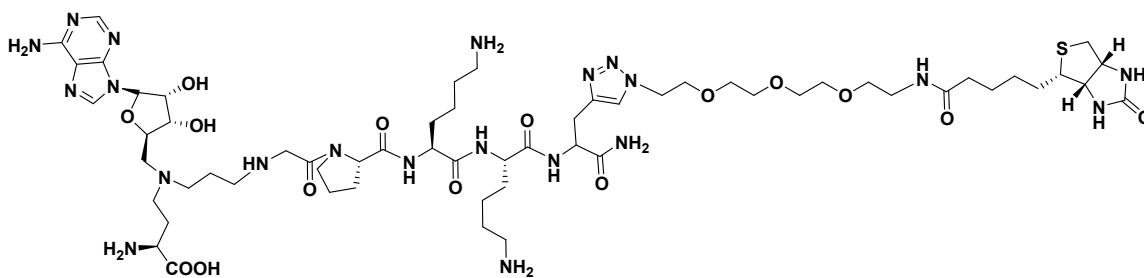

## MALDI-MS spectra of compound 6



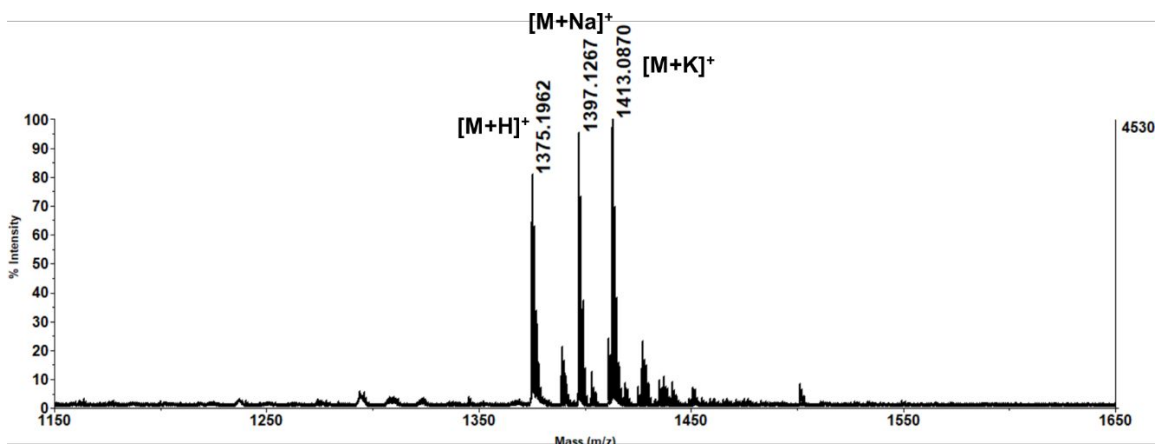

### HPLC spectra of compound 6

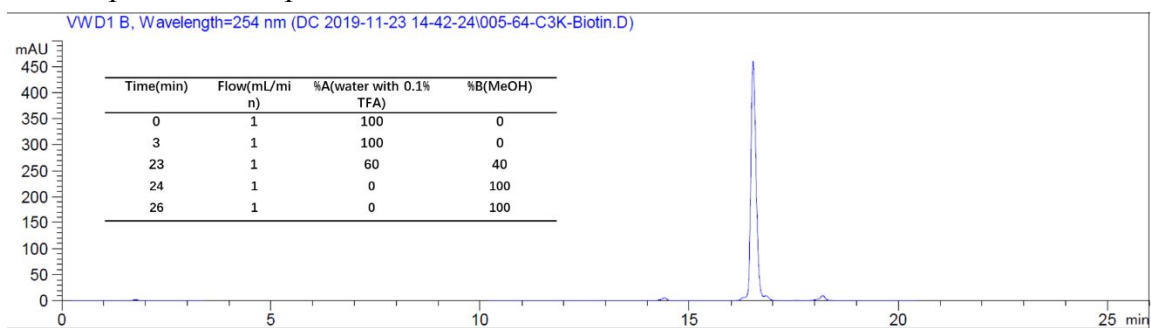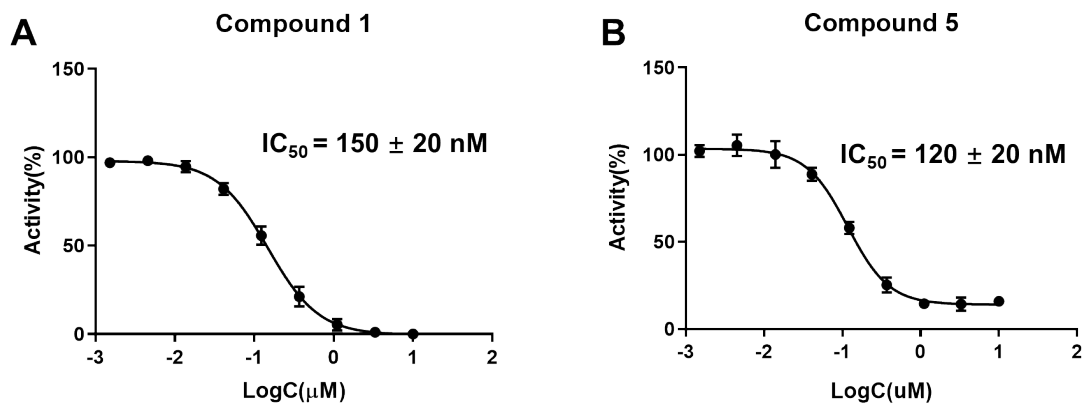

**Figure S1.**  $IC_{50}$  curves for compounds 1 (A) and 5 (B), respectively.

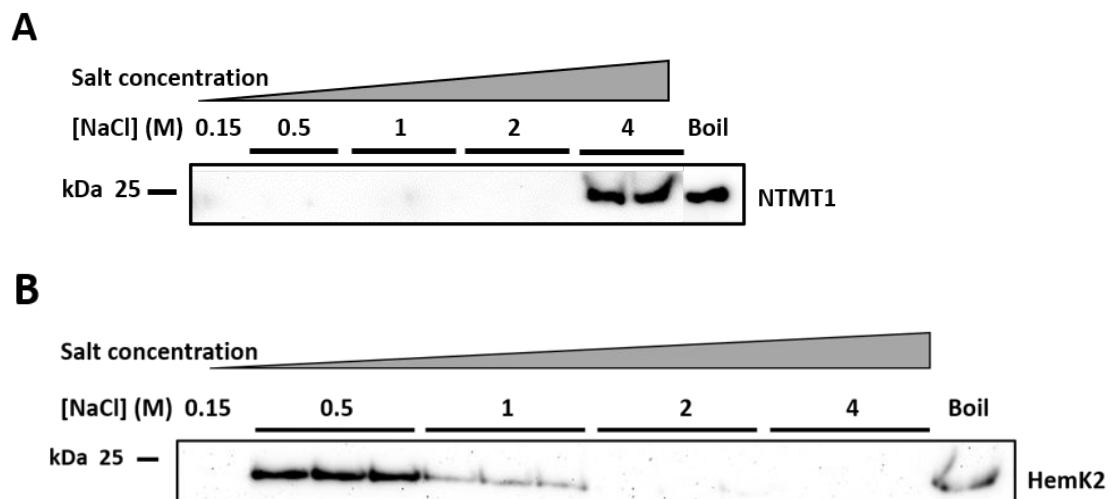

**Figure S2.** Pull-down studies with recombinant NTMT1 and HemK2-Trm112 complex from immobilized probe 6. (A) Probe 6 shows tight binding with NTMT1. Recombinant NTMT1 were incubated with probe 6 coupled streptavidin beads and eluted 4 M NaCl. (B) HemK2-Trm112 complex directly interacts with probe 6. HemK2 was eluted after

boiling the resin and was eluted off between 500 mM and 1M NaCl.

**Table S1. Proteomic analysis of HeLa cell proteomics enriched by probe 6 through LC-MS/MS.**

| Accession | Protein name                                                                               | Fold change = Log2(probe 6/ (inhibitor 1 + probe 6)) | Confidence value = $-\log_{10}(\text{P-value})$ |
|-----------|--------------------------------------------------------------------------------------------|------------------------------------------------------|-------------------------------------------------|
| O14578-3  | Isoform 3 of Citron Rho-interacting kinase [OS=Homo sapiens]                               | 12.1                                                 | 3.3                                             |
| Q9Y5N5    | HemK methyltransferase family member 2 [OS=Homo sapiens]                                   | 8.3                                                  | 2.8                                             |
| P51153    | Ras-related protein Rab-13 [OS=Homo sapiens]                                               | 8.3                                                  | 2.6                                             |
| O00571    | ATP-dependent RNA helicase DDX3X [OS=Homo sapiens]                                         | 7.7                                                  | 2.5                                             |
| Q96AG4    | Leucine-rich repeat-containing protein 59 [OS=Homo sapiens]                                | 7.6                                                  | 1.6                                             |
| P04843    | Dolichyl-diphosphooligosaccharide--protein glycosyltransferase subunit 1 [OS=Homo sapiens] | 7.6                                                  | 2.5                                             |
| P84085    | ADP-ribosylation factor 5 [OS=Homo sapiens]                                                | 7.4                                                  | 2.6                                             |
| P27824-2  | Isoform 2 of Calnexin [OS=Homo sapiens]                                                    | 7.4                                                  | 2.4                                             |

|          |                                                                                               |     |     |
|----------|-----------------------------------------------------------------------------------------------|-----|-----|
| Q9BV86-1 | N-terminal Xaa-Pro-Lys N-methyltransferase 1 [OS=Homo sapiens]                                | 7.3 | 3.2 |
| P38919   | Eukaryotic initiation factor 4A-III [OS=Homo sapiens]                                         | 7.2 | 2.4 |
| Q08211   | Atp-dependent rna helicase a [OS=Homo sapiens]                                                | 6.9 | 2.5 |
| Q961X5   | Up-regulated during skeletal muscle growth protein 5 [OS=Homo sapiens]                        | 6.9 | 2.5 |
| P60842   | Eukaryotic initiation factor 4A-I [OS=Homo sapiens]                                           | 6.8 | 2.4 |
| Q9UI30   | Multifunctional methyltransferase subunit TRM112-like protein [OS=Homo sapiens]               | 6.8 | 2.5 |
| P61204   | ADP-ribosylation factor 3 [OS=Homo sapiens]                                                   | 6.7 | 2.5 |
| P51149   | ras-related protein Rab-7a [OS=Homo sapiens]                                                  | 6.6 | 2.4 |
| Q70UQ0-4 | Isoform 4 of Inhibitor of nuclear factor kappa-B kinase-interacting protein [OS=Homo sapiens] | 6.5 | 2.4 |
| Q9Y3U8   | 60S ribosomal protein L36 [OS=Homo sapiens]                                                   | 6.4 | 2.3 |
| P13073   | Cytochrome c oxidase subunit 4 isoform 1, mitochondrial [OS=Homo sapiens]                     | 6.4 | 1.7 |
| Q9NR30-1 | Nucleolar RNA helicase 2 [OS=Homo sapiens]                                                    | 6.3 | 2.1 |
| P62826   | GTP-binding nuclear protein RAN [OS=Homo sapiens]                                             | 6.2 | 2.2 |
| P43243   | Matrin-3 [OS=Homo sapiens]                                                                    | 6.2 | 2.2 |
| O75746   | Calcium-binding mitochondrial carrier protein Aralar1 [OS=Homo sapiens]                       | 6.2 | 2.5 |
| Q9UJS0-2 | Isoform 2 of Calcium-binding mitochondrial carrier protein Aralar2 [OS=Homo sapiens]          | 6.2 | 2.5 |
| P00403   | Cytochrome c oxidase subunit 2 [OS=Homo sapiens]                                              | 6.2 | 1.9 |
| Q6DD88   | Atlastin-3 [OS=Homo sapiens]                                                                  | 6.1 | 2.3 |
| P51148-2 | Isoform 2 of Ras-related protein Rab-5C [OS=Homo sapiens]                                     | 6.0 | 2.3 |
| Q96A26   | Protein FAM162A [OS=Homo sapiens]                                                             | 5.9 | 2.3 |

|          |                                                                                    |     |     |
|----------|------------------------------------------------------------------------------------|-----|-----|
| O00567   | Nucleolar protein 56 [OS=Homo sapiens]                                             | 5.9 | 2.3 |
| Q9NZ45   | CDGSH iron-sulfur domain-containing protein 1 [OS=Homo sapiens]                    | 5.7 | 2.0 |
| P61224-1 | Ras-related protein Rap-1b [OS=Homo sapiens]                                       | 5.6 | 2.1 |
| Q14697-2 | Isoform 2 of Neutral alpha-glucosidase AB [OS=Homo sapiens]                        | 5.6 | 2.2 |
| Q9Y277-2 | Isoform 2 of Voltage-dependent anion-selective channel protein 3 [OS=Homo sapiens] | 5.5 | 0.9 |
| O75947-1 | ATP synthase subunit d, mitochondrial [OS=Homo sapiens]                            | 5.5 | 1.8 |
| Q9BVP2   | Guanine nucleotide-binding protein-like 3 [OS=Homo sapiens]                        | 5.5 | 2.0 |
| Q16790   | Carbonic anhydrase 9 [OS=Homo sapiens]                                             | 5.4 | 1.8 |
| O60762   | Dolichol-phosphate mannosyltransferase subunit 1 [OS=Homo sapiens]                 | 5.4 | 1.7 |
| O60506   | Heterogeneous nuclear ribonucleoprotein Q [OS=Homo sapiens]                        | 5.4 | 0.9 |
| O43169   | Cytochrome b5 type B [OS=Homo sapiens]                                             | 5.3 | 1.9 |
| Q9BWF3-1 | RNA-binding protein 4 [OS=Homo sapiens]                                            | 5.2 | 2.1 |
| Q9Y2X3   | Nucleolar protein 58 [OS=Homo sapiens]                                             | 5.2 | 2.1 |
| P36542-1 | ATP synthase subunit gamma, mitochondrial [OS=Homo sapiens]                        | 5.2 | 1.7 |
| P33993-1 | DNA replication licensing factor MCM7 [OS=Homo sapiens]                            | 5.1 | 2.0 |
| O43809   | Cleavage and polyadenylation specificity factor subunit 5 [OS=Homo sapiens]        | 5.1 | 1.7 |
| P12956   | X-ray repair cross-complementing protein 6 [OS=Homo sapiens]                       | 5.1 | 2.2 |
| Q07065   | Cytoskeleton-associated protein 4 [OS=Homo sapiens]                                | 5.0 | 2.1 |

|          |                                                                               |     |     |
|----------|-------------------------------------------------------------------------------|-----|-----|
| P01891   | HLA class I histocompatibility antigen, A-68 alpha chain [OS=Homo sapiens]    | 5.0 | 1.9 |
| P51648-2 | Isoform 2 of Fatty aldehyde dehydrogenase [OS=Homo sapiens]                   | 5.0 | 2.2 |
| P22626   | heterogeneous nuclear ribonucleoproteins A2/B1 [OS=Homo sapiens]              | 4.9 | 1.0 |
| P16615   | Sarcoplasmic/endoplasmic reticulum calcium ATPase 2 [OS=Homo sapiens]         | 4.9 | 0.9 |
| Q9NVI7-2 | Isoform 2 of ATPase family AAA domain-containing protein 3A [OS=Homo sapiens] | 4.9 | 1.4 |
| Q9Y4P3   | Transducin beta-like protein 2 [OS=Homo sapiens]                              | 4.9 | 2.0 |
| P20340-1 | Ras-related protein Rab-6A [OS=Homo sapiens]                                  | 4.8 | 1.2 |
| P61026   | ras-related protein rab-10 [OS=Homo sapiens]                                  | 4.7 | 1.3 |
| P11476-1 | Ras-related protein Rab-1A [OS=Homo sapiens]                                  | 4.7 | 1.3 |
| P21796   | voltage-dependent anion-selective channel protein 1 [OS=Homo sapiens]         | 4.7 | 1.1 |
| P61106   | Ras-related protein Rab-14 [OS=Homo sapiens]                                  | 4.7 | 1.3 |
| O00264   | Membrane-associated progesterone receptor component 1 [OS=Homo sapiens]       | 4.7 | 0.9 |
| P78527   | DNA-dependent protein kinase catalytic subunit [OS=Homo sapiens]              | 4.6 | 0.9 |
| P34897-1 | Serine hydroxymethyltransferase, mitochondrial [OS=Homo sapiens]              | 4.6 | 0.9 |
| P69905   | Hemoglobin subunit alpha [OS=Homo sapiens]                                    | 4.6 | 1.6 |
| P63173   | 60s ribosomal protein l38 [OS=Homo sapiens]                                   | 4.6 | 1.4 |
| P62491-1 | Ras-related protein Rab-11A [OS=Homo sapiens]                                 | 4.5 | 1.9 |
| P30508   | HLA class I histocompatibility antigen, Cw-12 alpha chain [OS=Homo sapiens]   | 4.5 | 1.4 |

|          |                                                                                         |     |     |
|----------|-----------------------------------------------------------------------------------------|-----|-----|
| Q12905   | Interleukin enhancer-binding factor 2<br>[OS=Homo sapiens]                              | 4.5 | 0.9 |
| P62273-2 | Isoform 2 of 40S ribosomal protein S29<br>[OS=Homo sapiens]                             | 4.4 | 0.8 |
| Q8NBJ4   | Golgi membrane protein 1 [OS=Homo sapiens]                                              | 4.4 | 1.9 |
| Q9BVK6   | Transmembrane emp24 domain-containing protein 9 [OS=Homo sapiens]                       | 4.4 | 1.6 |
| P16989-1 | Y-box-binding protein 3 [OS=Homo sapiens]                                               | 4.3 | 1.8 |
| P05556-1 | Integrin beta-1 [OS=Homo sapiens]                                                       | 4.3 | 0.9 |
| P46940   | Ras GTPase-activating-like protein IQGAP1 [OS=Homo sapiens]                             | 4.2 | 2.3 |
| O95292   | Vesicle-associated membrane protein-associated protein B/C [OS=Homo sapiens]            | 4.2 | 1.0 |
| P09669   | Cytochrome c oxidase subunit 6C [OS=Homo sapiens]                                       | 4.2 | 0.9 |
| Q9P0L0-2 | Isoform 2 of Vesicle-associated membrane protein-associated protein A [OS=Homo sapiens] | 4.2 | 1.5 |
| O00461   | Golgi integral membrane protein 4 [OS=Homo sapiens]                                     | 4.2 | 1.6 |
| Q9NZ01-1 | Very-long-chain enoyl-CoA reductase [OS=Homo sapiens]                                   | 4.1 | 0.9 |
| P06576   | ATP synthase subunit beta, mitochondrial [OS=Homo sapiens]                              | 4.1 | 3.0 |
| P61978-2 | Isoform 2 of Heterogeneous nuclear ribonucleoprotein K [OS=Homo sapiens]                | 4.0 | 1.2 |
| P22087   | rRNA 2'-O-methyltransferase fibrillarin [OS=Homo sapiens]                               | 4.0 | 1.3 |
| P62910   | 60S ribosomal protein L32 [OS=Homo sapiens]                                             | 3.9 | 1.6 |
| Q9NXW2-2 | Isoform 2 of DnaJ homolog subfamily B member 12 [OS=Homo sapiens]                       | 3.9 | 1.8 |
| O43390-2 | Isoform 2 of Heterogeneous nuclear ribonucleoprotein R [OS=Homo sapiens]                | 3.8 | 1.0 |

|          |                                                                                               |     |     |
|----------|-----------------------------------------------------------------------------------------------|-----|-----|
| P27635   | 60S ribosomal protein L10 [OS=Homo sapiens]                                                   | 3.7 | 1.3 |
| Q8NE86   | Calcium uniporter protein, mitochondrial [OS=Homo sapiens]                                    | 3.6 | 1.0 |
| O75367-1 | Core histone macro-H2A.1 [OS=Homo sapiens]                                                    | 3.5 | 1.0 |
| P62805   | histone H4 [OS=Homo sapiens]                                                                  | 3.5 | 1.4 |
| Q9Y5S2   | Serine/threonine-protein kinase MRCK beta [OS=Homo sapiens]                                   | 3.4 | 1.8 |
| P01889   | HLA class I histocompatibility antigen, B-7 alpha chain [OS=Homo sapiens]                     | 3.3 | 0.9 |
| P62753   | 40S RIBOSOMAL PROTEIN S6 [OS=Homo sapiens]                                                    | 3.3 | 1.2 |
| Q14254   | Flotillin-2 [OS=Homo sapiens]                                                                 | 3.3 | 1.3 |
| P42167   | Lamina-associated polypeptide 2, isoforms beta/gamma [OS=Homo sapiens]                        | 3.3 | 2.0 |
| P17301   | Integrin alpha-2 [OS=Homo sapiens]                                                            | 3.3 | 1.0 |
| Q96CW1   | AP-2 complex subunit mu [OS=Homo sapiens]                                                     | 3.2 | 1.2 |
| P42677   | 40S ribosomal protein S27 [OS=Homo sapiens]                                                   | 3.2 | 3.5 |
| Q96CS3   | FAS-associated factor 2 [OS=Homo sapiens]                                                     | 3.2 | 0.9 |
| Q9HDC9   | Adipocyte plasma membrane-associated protein [OS=Homo sapiens]                                | 3.1 | 0.8 |
| P49748-3 | Isoform 3 of Very long-chain specific acyl-CoA dehydrogenase, mitochondrial [OS=Homo sapiens] | 3.1 | 1.1 |
| P50914   | 60S ribosomal protein L14 [OS=Homo sapiens]                                                   | 3.1 | 2.0 |
| P27348   | 14-3-3 protein theta [OS=Homo sapiens]                                                        | 3.1 | 0.5 |
| Q9Y265   | RuvB-like 1 [OS=Homo sapiens]                                                                 | 3.1 | 1.0 |
| P62258-1 | 14-3-3 protein epsilon [OS=Homo sapiens]                                                      | 3.1 | 0.5 |
| P17844   | probable ATP-dependent RNA helicase DDX5 [OS=Homo sapiens]                                    | 3.1 | 2.8 |
| P61981   | 14-3-3 protein gamma [OS=Homo sapiens]                                                        | 3.0 | 0.5 |



|          |                                                                                    |     |     |
|----------|------------------------------------------------------------------------------------|-----|-----|
| P19388   | DNA-directed RNA polymerases I, II, and III subunit RPABC1 [OS=Homo sapiens]       | 3.0 | 0.6 |
| O14929   | histone acetyltransferase type B catalytic subunit [OS=Homo sapiens]               | 3.0 | 0.5 |
| P60866-2 | Isoform 2 of 40S ribosomal protein S20 [OS=Homo sapiens]                           | 3.0 | 1.0 |
| Q92841   | Probable ATP-dependent RNA helicase DDX17 [OS=Homo sapiens]                        | 2.9 | 1.8 |
| Q71UM5   | 40S ribosomal protein S27-like [OS=Homo sapiens]                                   | 2.9 | 2.3 |
| P31947-1 | 14-3-3 protein sigma [OS=Homo sapiens]                                             | 2.9 | 0.4 |
| P14625   | Endoplasmic reticulum chaperone protein [OS=Homo sapiens]                          | 2.8 | 3.9 |
| P02788   | Lactotransferrin [OS=Homo sapiens]                                                 | 2.7 | 0.5 |
| P05023   | Sodium/potassium-transporting ATPase subunit alpha-1 [OS=Homo sapiens]             | 2.7 | 1.7 |
| Q9Y5M8   | signal recognition particle receptor subunit beta [OS=Homo sapiens]                | 2.7 | 1.3 |
| P45880-1 | Isoform 1 of Voltage-dependent anion-selective channel protein 2 [OS=Homo sapiens] | 2.7 | 1.4 |
| P53680   | AP-2 complex subunit sigma [OS=Homo sapiens]                                       | 2.7 | 0.5 |
| O75396   | Vesicle-trafficking protein SEC22b [OS=Homo sapiens]                               | 2.6 | 1.6 |
| P48047   | ATP synthase subunit O, mitochondrial [OS=Homo sapiens]                            | 2.6 | 2.0 |
| P63104-1 | 14-3-3 protein zeta/delta [OS=Homo sapiens]                                        | 2.6 | 0.5 |
| P29401-2 | Isoform 2 of Transketolase [OS=Homo sapiens]                                       | 2.6 | 0.9 |
| P14868   | Aspartate--tRNA ligase, cytoplasmic [OS=Homo sapiens]                              | 2.5 | 1.9 |
| O00425   | Insulin-like growth factor 2 mRNA-binding protein 3 [OS=Homo sapiens]              | 2.5 | 0.6 |
| P31946   | 14-3-3 protein beta/alpha [OS=Homo sapiens]                                        | 2.5 | 0.4 |

|          |                                                                                                 |     |     |
|----------|-------------------------------------------------------------------------------------------------|-----|-----|
| P08237-3 | Isoform 3 of ATP-dependent 6-phosphofructokinase, muscle type [OS=Homo sapiens]                 | 2.4 | 0.3 |
| Q9Y6M9   | NADH dehydrogenase [ubiquinone] 1 beta subcomplex subunit 9 [OS=Homo sapiens]                   | 2.4 | 0.8 |
| P25705-1 | ATP synthase subunit alpha, mitochondrial [OS=Homo sapiens]                                     | 2.4 | 1.7 |
| P39023   | 60S ribosomal protein L3 [OS=Homo sapiens]                                                      | 2.4 | 1.3 |
| Q9HA64   | Ketosamine-3-kinase [OS=Homo sapiens]                                                           | 2.4 | 1.8 |
| P32969   | 60S ribosomal protein L9 [OS=Homo sapiens]                                                      | 2.3 | 2.4 |
| Q8N1F7-1 | Nuclear pore complex protein Nup93 [OS=Homo sapiens]                                            | 2.3 | 1.4 |
| P62424   | 60S ribosomal protein L7a [OS=Homo sapiens]                                                     | 2.3 | 1.2 |
| Q96A08   | Histone H2B type 1-A [OS=Homo sapiens]                                                          | 2.3 | 1.0 |
| Q16891-2 | Isoform 2 of MICOS complex subunit MIC60 [OS=Homo sapiens]                                      | 2.3 | 1.9 |
| Q16891-4 | Isoform 4 of MICOS complex subunit MIC60 [OS=Homo sapiens]                                      | 2.3 | 1.9 |
| Q96S19-4 | Isoform 4 of UPF0585 protein C16orf13 [OS=Homo sapiens]                                         | 2.2 | 0.9 |
| Q9Y3D9   | 28S ribosomal protein S23, mitochondrial [OS=Homo sapiens]                                      | 2.2 | 1.1 |
| P39656   | Dolichyl-diphosphooligosaccharide--protein glycosyltransferase 48 kDa subunit [OS=Homo sapiens] | 2.2 | 0.4 |
| Q07020   | 60S ribosomal protein L18 [OS=Homo sapiens]                                                     | 2.2 | 3.0 |
| P83731   | 60S ribosomal protein L24 [OS=Homo sapiens]                                                     | 2.1 | 1.3 |
| P40939   | Trifunctional enzyme subunit alpha, mitochondrial [OS=Homo sapiens]                             | 2.1 | 1.5 |
| P52597   | Heterogeneous nuclear ribonucleoprotein F [OS=Homo sapiens]                                     | 2.1 | 1.6 |

|          |                                                                          |     |     |
|----------|--------------------------------------------------------------------------|-----|-----|
| P42765   | 3-ketoacyl-CoA thiolase, mitochondrial [OS=Homo sapiens]                 | 2.0 | 0.4 |
| P31689-1 | DnaJ homolog subfamily A member 1 [OS=Homo sapiens]                      | 2.0 | 1.8 |
| P24539   | ATP synthase F(0) complex subunit B1, mitochondrial [OS=Homo sapiens]    | 1.9 | 1.5 |
| P23396-1 | 40S ribosomal protein S3 [OS=Homo sapiens]                               | 1.9 | 1.3 |
| P18085   | ADP-ribosylation factor 4 [OS=Homo sapiens]                              | 1.8 | 1.6 |
| Q12797   | Aspartyl/Asparaginyl beta-hydroxylase [OS=Homo sapiens]                  | 1.8 | 0.4 |
| Q86UE4   | protein LYRIC [OS=Homo sapiens]                                          | 1.7 | 0.9 |
| P62241   | 40S ribosomal protein S8 [OS=Homo sapiens]                               | 1.7 | 1.3 |
| Q9Y241   | HIG1 domain family member 1A, mitochondrial [OS=Homo sapiens]            | 1.7 | 0.5 |
| P50454   | Serpin H1 [OS=Homo sapiens]                                              | 1.7 | 0.9 |
| P18124   | 60S ribosomal protein L7 [OS=Homo sapiens]                               | 1.6 | 1.1 |
| P08574   | Cytochrome c1, heme protein, mitochondrial [OS=Homo sapiens]             | 1.6 | 0.4 |
| P10809   | 60 kDa heat shock protein, mitochondrial [OS=Homo sapiens]               | 1.6 | 1.5 |
| P07195   | L-lactate dehydrogenase B chain [OS=Homo sapiens]                        | 1.6 | 0.3 |
| Q13492-1 | Phosphatidylinositol-binding clathrin assembly protein [OS=Homo sapiens] | 1.6 | 0.3 |
| Q92769   | Histone deacetylase 2 [OS=Homo sapiens]                                  | 1.5 | 0.3 |
| P46781   | 40S ribosomal protein S9 [OS=Homo sapiens]                               | 1.5 | 1.1 |
| P04075   | fructose-bisphosphate aldolase A [OS=Homo sapiens]                       | 1.5 | 0.3 |
| Q9Y230   | RuvB-like 2 [OS=Homo sapiens]                                            | 1.5 | 2.0 |
| P35268   | 60S ribosomal protein L22 [OS=Homo sapiens]                              | 1.5 | 0.9 |
| P08195-4 | Isoform 4 of 4F2 cell-surface antigen heavy chain [OS=Homo sapiens]      | 1.5 | 0.7 |

|          |                                                                     |     |     |
|----------|---------------------------------------------------------------------|-----|-----|
| P61353   | 60S ribosomal protein L27 [OS=Homo sapiens]                         | 1.4 | 0.7 |
| Q15233   | Non-POU domain-containing octamer-binding protein [OS=Homo sapiens] | 1.4 | 0.6 |
| Q12931   | heat shock protein 75 kDa, mitochondrial [OS=Homo sapiens]          | 1.4 | 0.2 |
| Q15365   | Poly(RC)-binding protein 1 [OS=Homo sapiens]                        | 1.4 | 0.9 |
| P62244   | 40S ribosomal protein S15a [OS=Homo sapiens]                        | 1.4 | 1.6 |
| P02786   | Transferrin receptor protein 1 [OS=Homo sapiens]                    | 1.3 | 1.5 |
| Q7Z2W4   | zinc finger CCCH-type antiviral protein 1 [OS=Homo sapiens]         | 1.2 | 0.7 |
| Q14684   | Ribosomal RNA processing protein 1 homolog B [OS=Homo sapiens]      | 1.2 | 1.0 |
| O95782   | AP-2 complex subunit alpha-1 [OS=Homo sapiens]                      | 1.2 | 0.6 |
| Q99567   | Nuclear pore complex protein Nup88 [OS=Homo sapiens]                | 1.2 | 0.2 |
| P46776   | 60S ribosomal protein L27a [OS=Homo sapiens]                        | 1.2 | 1.0 |
| P57721-1 | Poly(rC)-binding protein 3 [OS=Homo sapiens]                        | 1.2 | 1.1 |
| Q00839   | Heterogeneous nuclear ribonucleoprotein U [OS=Homo sapiens]         | 1.1 | 1.2 |
| P31943   | Heterogeneous nuclear ribonucleoprotein H [OS=Homo sapiens]         | 1.1 | 0.8 |
| P63010-2 | Isoform 2 of AP-2 complex subunit beta [OS=Homo sapiens]            | 1.1 | 0.8 |
| P08238   | Heat shock protein HSP 90-beta [OS=Homo sapiens]                    | 1.1 | 2.1 |
| P67809   | Nuclease-sensitive element-binding protein 1 [OS=Homo sapiens]      | 1.1 | 0.2 |
| P54136-1 | arginine--tRNA ligase, cytoplasmic [OS=Homo sapiens]                | 1.1 | 1.3 |
| O43175   | D-3-phosphoglycerate dehydrogenase [OS=Homo sapiens]                | 1.1 | 3.1 |

|          |                                                                       |     |     |
|----------|-----------------------------------------------------------------------|-----|-----|
| Q9NX63   | MICOS complex subunit MIC19<br>[OS=Homo sapiens]                      | 1.0 | 1.4 |
| P35232   | Prohibitin [OS=Homo sapiens]                                          | 0.9 | 0.5 |
| P62829   | 60S ribosomal protein L23 [OS=Homo sapiens]                           | 0.9 | 0.4 |
| Q01813   | ATP-dependent 6-phosphofructokinase, platelet type [OS=Homo sapiens]  | 0.9 | 1.3 |
| P05388   | 60S acidic ribosomal protein P0 [OS=Homo sapiens]                     | 0.9 | 1.5 |
| P52272   | Heterogeneous nuclear ribonucleoprotein M [OS=Homo sapiens]           | 0.9 | 0.5 |
| Q9UHX1-1 | poly(U)-binding-splicing factor PUF60 [OS=Homo sapiens]               | 0.9 | 0.1 |
| P18077   | 60S ribosomal protein L35a [OS=Homo sapiens]                          | 0.9 | 1.7 |
| P39019   | 40S ribosomal protein S19 [OS=Homo sapiens]                           | 0.9 | 0.8 |
| P28066-1 | Proteasome subunit alpha type-5 [OS=Homo sapiens]                     | 0.9 | 0.1 |
| Q5QNW6-2 | Isoform 2 of Histone H2B type 2-F [OS=Homo sapiens]                   | 0.8 | 0.5 |
| P62277   | 40S ribosomal protein S13 [OS=Homo sapiens]                           | 0.8 | 0.7 |
| P62701   | 40S ribosomal protein S4, X isoform [OS=Homo sapiens]                 | 0.8 | 1.4 |
| Q14980-1 | nuclear mitotic apparatus protein 1 [OS=Homo sapiens]                 | 0.8 | 0.4 |
| Q09666-1 | Neuroblast differentiation-associated protein AHNAK [OS=Homo sapiens] | 0.8 | 0.9 |
| P46783   | 40S ribosomal protein S10 [OS=Homo sapiens]                           | 0.7 | 1.1 |
| Q99714-1 | 3-hydroxyacyl-CoA dehydrogenase type-2 [OS=Homo sapiens]              | 0.7 | 0.9 |
| P06899   | Histone H2B type 1-J [OS=Homo sapiens]                                | 0.7 | 0.4 |
| P04406-1 | glyceraldehyde-3-phosphate dehydrogenase [OS=Homo sapiens]            | 0.7 | 0.2 |
| P11940-1 | Polyadenylate-binding protein 1 [OS=Homo sapiens]                     | 0.7 | 1.0 |

|          |                                                                |     |     |
|----------|----------------------------------------------------------------|-----|-----|
| P46778   | 60S ribosomal protein L21 [OS=Homo sapiens]                    | 0.6 | 0.6 |
| P62847-4 | Isoform 4 of 40S ribosomal protein S24 [OS=Homo sapiens]       | 0.6 | 0.3 |
| P62266   | 40S ribosomal protein S23 [OS=Homo sapiens]                    | 0.6 | 0.6 |
| Q99623   | Prohibitin-2 [OS=Homo sapiens]                                 | 0.5 | 0.4 |
| P18621-3 | Isoform 3 of 60S ribosomal protein L17 [OS=Homo sapiens]       | 0.5 | 0.3 |
| P68366   | Tubulin alpha-4A chain [OS=Homo sapiens]                       | 0.5 | 0.3 |
| P68104   | Elongation factor 1-alpha 1 [OS=Homo sapiens]                  | 0.5 | 0.4 |
| Q96PK6-1 | RNA-binding protein 14 [OS=Homo sapiens]                       | 0.5 | 0.5 |
| P35613   | Basigin [OS=Homo sapiens]                                      | 0.5 | 0.7 |
| Q13573   | SNW domain-containing protein 1 [OS=Homo sapiens]              | 0.4 | 0.1 |
| P26641   | elongation factor 1-gamma [OS=Homo sapiens]                    | 0.4 | 0.6 |
| P84098   | 60S ribosomal protein L19 [OS=Homo sapiens]                    | 0.4 | 0.2 |
| P04083   | annexin A1 [OS=Homo sapiens]                                   | 0.4 | 0.1 |
| Q9BWM7   | Sideroflexin-3 [OS=Homo sapiens]                               | 0.4 | 0.1 |
| P06493   | Cyclin-dependent kinase 1 [OS=Homo sapiens]                    | 0.3 | 0.3 |
| P06733-1 | alpha-enolase [OS=Homo sapiens]                                | 0.3 | 0.0 |
| P60900   | Proteasome subunit alpha type-6 [OS=Homo sapiens]              | 0.3 | 0.1 |
| Q13310-3 | Isoform 3 of Polyadenylate-binding protein 4 [OS=Homo sapiens] | 0.3 | 0.5 |
| P62888   | 60S ribosomal protein L30 [OS=Homo sapiens]                    | 0.2 | 0.1 |
| P26373-1 | 60S ribosomal protein L13 [OS=Homo sapiens]                    | 0.2 | 0.3 |
| P07900-2 | Isoform 2 of Heat shock protein HSP 90-alpha [OS=Homo sapiens] | 0.2 | 0.4 |
| P62913   | 60S ribosomal protein L11 [OS=Homo sapiens]                    | 0.2 | 0.6 |

|          |                                                                                     |      |     |
|----------|-------------------------------------------------------------------------------------|------|-----|
| P62750   | 60S ribosomal protein L23a [OS=Homo sapiens]                                        | 0.2  | 0.0 |
| Q9BUF5   | Tubulin beta-6 chain [OS=Homo sapiens]                                              | 0.2  | 0.4 |
| P04908   | histone H2A type 1-B/E [OS=Homo sapiens]                                            | 0.2  | 0.1 |
| O43795   | Unconventional myosin-Ib [OS=Homo sapiens]                                          | 0.2  | 0.1 |
| P27105   | erythrocyte band 7 integral membrane protein [OS=Homo sapiens]                      | 0.2  | 0.1 |
| Q12965   | unconventional myosin-Ie [OS=Homo sapiens]                                          | 0.1  | 0.1 |
| P22695   | Cytochrome b-c1 complex subunit 2, mitochondrial [OS=Homo sapiens]                  | 0.1  | 0.0 |
| P83881   | 60S ribosomal protein L36a [OS=Homo sapiens]                                        | 0.1  | 0.0 |
| Q13509   | tubulin beta-3 chain [OS=Homo sapiens]                                              | 0.1  | 0.1 |
| Q92614-1 | Unconventional myosin-XVIIIa [OS=Homo sapiens]                                      | 0.1  | 0.0 |
| P00338-3 | Isoform 3 of L-lactate dehydrogenase A chain [OS=Homo sapiens]                      | 0.0  | 0.0 |
| P07910-1 | Heterogeneous nuclear ribonucleoproteins C1/C2 [OS=Homo sapiens]                    | 0.0  | 0.0 |
| P14618   | Pyruvate kinase PKM [OS=Homo sapiens]                                               | 0.0  | 0.0 |
| Q9UKS6   | Protein kinase C and casein kinase substrate in neurons protein 3 [OS=Homo sapiens] | 0.0  | 0.0 |
| P68371   | Tubulin beta-4B chain [OS=Homo sapiens]                                             | 0.0  | 0.0 |
| P36578   | 60S ribosomal protein L4 [OS=Homo sapiens]                                          | 0.0  | 0.0 |
| P11021   | 78 kDa glucose-regulated protein [OS=Homo sapiens]                                  | 0.0  | 0.0 |
| P19338   | Nucleolin [OS=Homo sapiens]                                                         | -0.1 | 0.0 |
| P05387   | 60S acidic ribosomal protein P2 [OS=Homo sapiens]                                   | -0.1 | 0.1 |
| P61254   | 60S ribosomal protein L26 [OS=Homo sapiens]                                         | -0.2 | 0.1 |

|          |                                                                                                                                    |      |     |
|----------|------------------------------------------------------------------------------------------------------------------------------------|------|-----|
| Q01105   | Protein SET [OS=Homo sapiens]                                                                                                      | -0.2 | 0.0 |
| P21333   | Filamin-A [OS=Homo sapiens]                                                                                                        | -0.2 | 0.1 |
| P07814   | Bifunctional glutamate/proline--tRNA ligase [OS=Homo sapiens]                                                                      | -0.2 | 0.1 |
| Q02878   | 60S ribosomal protein L6 [OS=Homo sapiens]                                                                                         | -0.2 | 0.1 |
| Q14244-7 | Isoform 7 of Ensconsin [OS=Homo sapiens]                                                                                           | -0.2 | 0.3 |
| P0DMV8   | heat shock 70 kDa protein 1A [OS=Homo sapiens]                                                                                     | -0.3 | 0.3 |
| P36957   | Dihydrolipoyllysine-residue succinyltransferase component of 2-oxoglutarate dehydrogenase complex, mitochondrial [OS=Homo sapiens] | -0.3 | 0.1 |
| P62851   | 40S ribosomal protein S25 [OS=Homo sapiens]                                                                                        | -0.3 | 0.2 |
| P61513   | 60S ribosomal protein L37a [OS=Homo sapiens]                                                                                       | -0.3 | 0.0 |
| P62906   | 60S ribosomal protein L10A [OS=Homo sapiens]                                                                                       | -0.3 | 0.5 |
| P63096-1 | Guanine nucleotide-binding protein G(i) subunit alpha-1 [OS=Homo sapiens]                                                          | -0.3 | 0.3 |
| P05141   | ADP/ATP translocase 2 [OS=Homo sapiens]                                                                                            | -0.3 | 0.2 |
| P62249   | 40S ribosomal protein S16 [OS=Homo sapiens]                                                                                        | -0.3 | 0.3 |
| P07437   | tubulin beta chain [OS=Homo sapiens]                                                                                               | -0.3 | 0.4 |
| Q15046   | Lysine--tRNA ligase [OS=Homo sapiens]                                                                                              | -0.4 | 0.9 |
| P38646   | Stress-70 protein, mitochondrial [OS=Homo sapiens]                                                                                 | -0.4 | 0.9 |
| P35579-1 | Myosin-9 [OS=Homo sapiens]                                                                                                         | -0.4 | 0.2 |
| P49411   | elongation factor Tu, mitochondrial [OS=Homo sapiens]                                                                              | -0.5 | 0.5 |
| Q02543   | 60S ribosomal protein L18a [OS=Homo sapiens]                                                                                       | -0.5 | 0.2 |
| Q8WV41   | Sorting nexin-33 [OS=Homo sapiens]                                                                                                 | -0.5 | 0.1 |
| P0C0S5   | Histone H2A.Z [OS=Homo sapiens]                                                                                                    | -0.5 | 0.2 |



|          |                                                                                         |      |     |
|----------|-----------------------------------------------------------------------------------------|------|-----|
| Q13155   | aminoacyl tRNA synthase complex-interacting multifunctional protein 2 [OS=Homo sapiens] | -0.5 | 0.1 |
| Q69YQ0-1 | Cytospin-A [OS=Homo sapiens]                                                            | -0.5 | 0.3 |
| Q9BQE3   | Tubulin alpha-1C chain [OS=Homo sapiens]                                                | -0.6 | 0.5 |
| Q4KMQ1   | Taperin [OS=Homo sapiens]                                                               | -0.6 | 0.2 |
| P06702   | Protein S100-A9 [OS=Homo sapiens]                                                       | -0.6 | 0.1 |
| Q9BVA1   | Tubulin beta-2B chain [OS=Homo sapiens]                                                 | -0.6 | 0.7 |
| P11142-1 | Heat shock cognate 71 kDa protein [OS=Homo sapiens]                                     | -0.6 | 0.7 |
| P09651-1 | Heterogeneous nuclear ribonucleoprotein A1 [OS=Homo sapiens]                            | -0.6 | 0.4 |
| P55084   | Trifunctional enzyme subunit beta, mitochondrial [OS=Homo sapiens]                      | -0.7 | 0.1 |
| Q92522   | Histone H1x [OS=Homo sapiens]                                                           | -0.7 | 0.1 |
| P08754   | Guanine nucleotide-binding protein G(k) subunit alpha [OS=Homo sapiens]                 | -0.7 | 0.5 |
| Q96EY1-1 | DnaJ homolog subfamily A member 3, mitochondrial [OS=Homo sapiens]                      | -0.7 | 0.2 |
| P61247   | 40S ribosomal protein S3a [OS=Homo sapiens]                                             | -0.7 | 0.6 |
| P35237   | serpin B6 [OS=Homo sapiens]                                                             | -0.8 | 0.2 |
| P12236   | ADP/ATP translocase 3 [OS=Homo sapiens]                                                 | -0.8 | 0.6 |
| Q562R1   | Beta-actin-like protein 2 [OS=Homo sapiens]                                             | -0.8 | 0.4 |
| P17858-1 | ATP-dependent 6-phosphofructokinase, liver type [OS=Homo sapiens]                       | -0.8 | 0.7 |
| Q81VT2   | Mitotic interactor and substrate of PLK1 [OS=Homo sapiens]                              | -0.8 | 0.3 |
| Q9HAV0   | Guanine nucleotide-binding protein subunit beta-4 [OS=Homo sapiens]                     | -0.8 | 0.1 |
| O00763   | Acetyl-CoA carboxylase 2 [OS=Homo sapiens]                                              | -0.9 | 1.1 |
| P49790   | Nuclear pore complex protein Nup153 [OS=Homo sapiens]                                   | -0.9 | 0.2 |

|          |                                                                                           |      |     |
|----------|-------------------------------------------------------------------------------------------|------|-----|
| P51571   | translocon-associated protein subunit delta [OS=Homo sapiens]                             | -0.9 | 0.2 |
| P04899-4 | Isoform sGi2 of Guanine nucleotide-binding protein G(i) subunit alpha-2 [OS=Homo sapiens] | -0.9 | 1.1 |
| P46777   | 60S ribosomal protein L5 [OS=Homo sapiens]                                                | -1.0 | 0.1 |
| P62879   | Guanine nucleotide-binding protein G(I)/G(S)/G(T) subunit beta-2 [OS=Homo sapiens]        | -1.0 | 0.1 |
| Q9Y512   | sorting and assembly machinery component 50 homolog [OS=Homo sapiens]                     | -1.1 | 0.2 |
| Q6WCQ1-2 | Isoform 2 of Myosin phosphatase Rho-interacting protein [OS=Homo sapiens]                 | -1.1 | 0.2 |
| Q9Y613-1 | Isoform 2 of Epsin-1 [OS=Homo sapiens]                                                    | -1.1 | 1.6 |
| P23284   | peptidyl-prolyl cis-trans isomerase B [OS=Homo sapiens]                                   | -1.1 | 0.5 |
| Q5T750   | Skin-specific protein 32 [OS=Homo sapiens]                                                | -1.1 | 0.2 |
| P62263   | 40S ribosomal protein S14 [OS=Homo sapiens]                                               | -1.2 | 0.8 |
| P05166-2 | Isoform 2 of Propionyl-CoA carboxylase beta chain, mitochondrial [OS=Homo sapiens]        | -1.2 | 0.9 |
| Q9NZT1   | Calmodulin-like protein 5 [OS=Homo sapiens]                                               | -1.2 | 0.6 |
| P05165-1 | Propionyl-CoA carboxylase alpha chain, mitochondrial [OS=Homo sapiens]                    | -1.2 | 1.9 |
| P23528   | Cofilin-1 [OS=Homo sapiens]                                                               | -1.2 | 0.1 |
| P02545   | Prelamin-A/C [OS=Homo sapiens]                                                            | -1.2 | 0.2 |
| P40429   | 60S ribosomal protein L13a [OS=Homo sapiens]                                              | -1.2 | 0.2 |
| P62873   | Guanine nucleotide-binding protein G(I)/G(S)/G(T) subunit beta-1 [OS=Homo sapiens]        | -1.4 | 0.2 |
| P62269   | 40S ribosomal protein S18 [OS=Homo sapiens]                                               | -1.4 | 3.4 |

|          |                                                                                      |      |     |
|----------|--------------------------------------------------------------------------------------|------|-----|
| Q13085-1 | Acetyl-CoA carboxylase 1 [OS=Homo sapiens]                                           | -1.4 | 1.8 |
| P31327-3 | Isoform 3 of Carbamoyl-phosphate synthase [ammonia], mitochondrial [OS=Homo sapiens] | -1.4 | 1.9 |
| P27708   | CAD protein [OS=Homo sapiens]                                                        | -1.4 | 1.9 |
| P62917   | 60S ribosomal protein L8 [OS=Homo sapiens]                                           | -1.4 | 0.6 |
| P62987   | Ubiquitin-60S ribosomal protein L40 [OS=Homo sapiens]                                | -1.4 | 0.7 |
| P62979   | Ubiquitin-40S ribosomal protein S27a [OS=Homo sapiens]                               | -1.4 | 0.7 |
| P30050-1 | 60S ribosomal protein L12 [OS=Homo sapiens]                                          | -1.4 | 1.6 |
| O94905-1 | Erlin-2 [OS=Homo sapiens]                                                            | -1.5 | 0.4 |
| Q00325-1 | Phosphate carrier protein, mitochondrial [OS=Homo sapiens]                           | -1.5 | 0.8 |
| P63000-2 | Isoform B of Ras-related C3 botulinum toxin substrate 1 [OS=Homo sapiens]            | -1.5 | 0.3 |
| P06748   | Nucleophosmin [OS=Homo sapiens]                                                      | -1.5 | 0.2 |
| P62280   | 40S ribosomal protein S11 [OS=Homo sapiens]                                          | -1.6 | 1.4 |
| P12004   | proliferating cell nuclear antigen [OS=Homo sapiens]                                 | -1.6 | 1.3 |
| Q96HS1-1 | Serine/threonine-protein phosphatase Pgam5, mitochondrial [OS=Homo sapiens]          | -1.7 | 0.9 |
| Q06830   | peroxiredoxin-1 [OS=Homo sapiens]                                                    | -1.7 | 0.7 |
| Q8N3V7-1 | synaptopodin [OS=Homo sapiens]                                                       | -1.9 | 0.4 |
| B011T2-1 | unconventional myosin-Ig [OS=Homo sapiens]                                           | -1.9 | 0.5 |
| Q8NFJ5   | Retinoic acid-induced protein 3 [OS=Homo sapiens]                                    | -1.9 | 1.1 |
| P81605-2 | Isoform 2 of Dermcidin [OS=Homo sapiens]                                             | -1.9 | 0.5 |
| P35658-3 | Isoform 3 of Nuclear pore complex protein Nup214 [OS=Homo sapiens]                   | -1.9 | 1.0 |
| P61626   | lysozyme c [OS=Homo sapiens]                                                         | -1.9 | 0.8 |
| P47756-1 | F-actin-capping protein subunit beta [OS=Homo sapiens]                               | -1.9 | 0.4 |

|          |                                                                                                      |      |     |
|----------|------------------------------------------------------------------------------------------------------|------|-----|
| P07355   | Annexin A2 [OS=Homo sapiens]                                                                         | -2.0 | 0.6 |
| P61313-1 | 60S ribosomal protein L15 [OS=Homo sapiens]                                                          | -2.0 | 0.3 |
| Q86V48-1 | Leucine zipper protein 1 [OS=Homo sapiens]                                                           | -2.0 | 1.2 |
| P29508   | Serpin B3 [OS=Homo sapiens]                                                                          | -2.1 | 0.4 |
| O43707   | Alpha-actinin-4 [OS=Homo sapiens]                                                                    | -2.1 | 1.5 |
| Q14978-2 | Isoform Beta of Nucleolar and coiled-body phosphoprotein 1 [OS=Homo sapiens]                         | -2.1 | 1.2 |
| Q15149-1 | plectin [OS=Homo sapiens]                                                                            | -2.2 | 0.8 |
| Q12904-2 | Isoform 2 of Aminoacyl tRNA synthase complex-interacting multifunctional protein 1 [OS=Homo sapiens] | -2.3 | 0.8 |
| P51572-2 | Isoform 2 of B-cell receptor-associated protein 31 [OS=Homo sapiens]                                 | -2.3 | 1.4 |
| Q13263   | Transcription intermediary factor 1-beta [OS=Homo sapiens]                                           | -2.3 | 1.2 |
| O95425   | Supervillin [OS=Homo sapiens]                                                                        | -2.3 | 0.6 |
| P09493-5 | Isoform 5 of Tropomyosin alpha-1 chain [OS=Homo sapiens]                                             | -2.4 | 0.4 |
| P31153   | S-adenosylmethionine synthase isoform type-2 [OS=Homo sapiens]                                       | -2.4 | 0.6 |
| O75477   | erlin-1 [OS=Homo sapiens]                                                                            | -2.4 | 0.7 |
| Q86YZ3   | Hornerin [OS=Homo sapiens]                                                                           | -2.4 | 1.2 |
| P25311   | Zinc-alpha-2-glycoprotein [OS=Homo sapiens]                                                          | -2.5 | 1.1 |
| Q9UHB6-4 | Isoform 4 of LIM domain and actin-binding protein 1 [OS=Homo sapiens]                                | -2.5 | 0.8 |
| Q9UHB6   | LIM domain and actin-binding protein 1 [OS=Homo sapiens]                                             | -2.5 | 0.8 |
| P04040   | catalase [OS=Homo sapiens]                                                                           | -2.5 | 0.8 |
| P05109   | Protein S100-A8 [OS=Homo sapiens]                                                                    | -2.6 | 0.4 |
| P50402   | Emerin [OS=Homo sapiens]                                                                             | -2.6 | 0.7 |
| P60660   | Myosin light polypeptide 6 [OS=Homo sapiens]                                                         | -2.6 | 0.5 |
| Q96P63-2 | Isoform 2 of Serpin B12 [OS=Homo sapiens]                                                            | -2.7 | 1.3 |
| Q08554-2 | Isoform 1B of Desmocollin-1 [OS=Homo sapiens]                                                        | -2.7 | 0.6 |

|          |                                                                                              |      |     |
|----------|----------------------------------------------------------------------------------------------|------|-----|
| P68032   | Actin, alpha cardiac muscle 1<br>[OS=Homo sapiens]                                           | -2.7 | 1.0 |
| Q08188   | Protein-glutamine gamma-<br>glutamyltransferase E [OS=Homo<br>sapiens]                       | -2.8 | 0.7 |
| P60953   | Cell division control protein 42 homolog<br>[OS=Homo sapiens]                                | -2.8 | 2.7 |
| Q13501-1 | sequestosome-1 [OS=Homo sapiens]                                                             | -2.9 | 2.6 |
| P48594   | Serpin B4 [OS=Homo sapiens]                                                                  | -2.9 | 0.5 |
| O75955   | Flotillin-1 [OS=Homo sapiens]                                                                | -2.9 | 0.9 |
| Q96C19   | EF-hand domain-containing protein D2<br>[OS=Homo sapiens]                                    | -3.0 | 1.1 |
| O14974   | Protein phosphatase 1 regulatory<br>subunit 12A [OS=Homo sapiens]                            | -3.0 | 1.2 |
| Q02978   | Mitochondrial 2-oxoglutarate/malate<br>carrier protein [OS=Homo sapiens]                     | -3.0 | 0.8 |
| Q02218   | 2-oxoglutarate dehydrogenase,<br>mitochondrial [OS=Homo sapiens]                             | -3.0 | 1.0 |
| O14639-5 | Isoform 5 of Actin-binding LIM protein<br>1 [OS=Homo sapiens]                                | -3.0 | 0.9 |
| P60174   | Triosephosphate isomerase [OS=Homo<br>sapiens]                                               | -3.1 | 1.2 |
| Q8WWI1-3 | Isoform 3 of LIM domain only protein 7<br>[OS=Homo sapiens]                                  | -3.1 | 1.8 |
| Q02413   | Desmoglein-1 [OS=Homo sapiens]                                                               | -3.1 | 0.7 |
| O75489   | NADH dehydrogenase [ubiquinone]<br>iron-sulfur protein 3, mitochondrial<br>[OS=Homo sapiens] | -3.1 | 4.0 |
| P52907   | F-actin-capping protein subunit alpha-1<br>[OS=Homo sapiens]                                 | -3.2 | 0.6 |
| P60468   | protein transport protein Sec61 subunit<br>beta [OS=Homo sapiens]                            | -3.2 | 1.1 |
| P32119   | Peroxiredoxin-2 [OS=Homo sapiens]                                                            | -3.3 | 0.6 |
| Q15517   | corneodesmosin [OS=Homo sapiens]                                                             | -3.4 | 0.5 |
| P11498   | pyruvate carboxylase, mitochondrial<br>[OS=Homo sapiens]                                     | -3.5 | 3.3 |
| P04792   | Heat shock protein beta-1 [OS=Homo<br>sapiens]                                               | -3.5 | 1.5 |
| Q01650   | large neutral amino acids transporter<br>small subunit 1 [OS=Homo sapiens]                   | -3.6 | 3.0 |

|          |                                                                                           |      |     |
|----------|-------------------------------------------------------------------------------------------|------|-----|
| P15924-1 | Desmoplakin [OS=Homo sapiens]                                                             | -3.6 | 0.6 |
| P31944   | Caspase-14 [OS=Homo sapiens]                                                              | -3.6 | 2.3 |
| P22735   | Protein-glutamine gamma-glutamyltransferase K [OS=Homo sapiens]                           | -3.7 | 1.3 |
| Q14847-2 | Isoform 2 of LIM and SH3 domain protein 1 [OS=Homo sapiens]                               | -3.7 | 4.1 |
| Q5SRD1   | Putative mitochondrial import inner membrane translocase subunit Tim23B [OS=Homo sapiens] | -3.7 | 0.8 |
| P05787-2 | Isoform 2 of Keratin, type II cytoskeletal 8 [OS=Homo sapiens]                            | -3.8 | 0.8 |
| Q13813   | Spectrin alpha chain, non-erythrocytic 1 [OS=Homo sapiens]                                | -4.0 | 1.8 |
| Q13813-2 | Isoform 2 of Spectrin alpha chain, non-erythrocytic 1 [OS=Homo sapiens]                   | -4.0 | 1.8 |
| Q9ULV4-3 | Isoform 3 of Coronin-1C [OS=Homo sapiens]                                                 | -4.0 | 0.9 |
| P52943   | Cysteine-rich protein 2 [OS=Homo sapiens]                                                 | -4.0 | 3.1 |
| Q01082-3 | Isoform 2 of Spectrin beta chain, non-erythrocytic 1 [OS=Homo sapiens]                    | -4.0 | 2.2 |
| Q6NYC8   | Phostensin [OS=Homo sapiens]                                                              | -4.2 | 2.4 |
| P50416   | Carnitine O-palmitoyltransferase 1, liver isoform [OS=Homo sapiens]                       | -4.3 | 3.9 |
| Q01082-1 | Spectrin beta chain, non-erythrocytic 1 [OS=Homo sapiens]                                 | -4.3 | 2.4 |
| O95816   | BAG family molecular chaperone regulator 2 [OS=Homo sapiens]                              | -4.4 | 2.9 |
| P16403   | Histone H1.2 [OS=Homo sapiens]                                                            | -4.5 | 2.0 |
| P10412   | Histone H1.4 [OS=Homo sapiens]                                                            | -4.5 | 2.0 |
| P49207   | 60S ribosomal protein L34 [OS=Homo sapiens]                                               | -4.5 | 0.7 |
| Q9NQT5   | exosome complex component RRP40 [OS=Homo sapiens]                                         | -4.5 | 2.6 |
| P06753-2 | Isoform 2 of Tropomyosin alpha-3 chain [OS=Homo sapiens]                                  | -4.6 | 1.7 |
| P50238   | Cysteine-rich protein 1 [OS=Homo sapiens]                                                 | -4.6 | 3.7 |

|          |                                                                        |      |     |
|----------|------------------------------------------------------------------------|------|-----|
| Q16643-3 | Isoform 3 of Drebrin [OS=Homo sapiens]                                 | -4.7 | 1.3 |
| Q9UDY2-7 | Isoform 7 of Tight junction protein ZO-2 [OS=Homo sapiens]             | -4.7 | 3.3 |
| P14923   | Junction plakoglobin [OS=Homo sapiens]                                 | -4.7 | 0.7 |
| P62081   | 40S ribosomal protein S7 [OS=Homo sapiens]                             | -4.8 | 1.0 |
| P05089-2 | Isoform 2 of Arginase-1 [OS=Homo sapiens]                              | -5.0 | 1.2 |
| O14950   | Myosin regulatory light chain 12B [OS=Homo sapiens]                    | -5.3 | 4.1 |
| Q9NYL9   | tropomodulin-3 [OS=Homo sapiens]                                       | -5.4 | 1.4 |
| P46779-3 | Isoform 3 of 60S ribosomal protein L28 [OS=Homo sapiens]               | -5.5 | 3.3 |
| P68431   | Histone H3.1 [OS=Homo sapiens]                                         | -5.5 | 1.5 |
| P16401   | Histone H1.5 [OS=Homo sapiens]                                         | -5.7 | 1.8 |
| Q5D862   | Filaggrin-2 [OS=Homo sapiens]                                          | -5.9 | 1.6 |
| O43324-1 | Eukaryotic translation elongation factor 1 epsilon-1 [OS=Homo sapiens] | -6.2 | 3.7 |
| P08670   | Vimentin [OS=Homo sapiens]                                             | -6.4 | 1.2 |
| Q13835   | Plakophilin-1 [OS=Homo sapiens]                                        | -6.6 | 1.3 |
| P62899   | 60S ribosomal protein L31 [OS=Homo sapiens]                            | -6.7 | 3.8 |
| P62854   | 40S ribosomal protein S26 [OS=Homo sapiens]                            | -6.7 | 2.2 |
| P08708   | 40S ribosomal protein S17 [OS=Homo sapiens]                            | -7.1 | 3.7 |
| P46782   | 40S ribosomal protein S5 [OS=Homo sapiens]                             | -7.3 | 5.0 |
| Q07157   | Tight junction protein ZO-1 [OS=Homo sapiens]                          | -7.8 | 3.3 |
| Q07157-2 | Isoform Short of Tight junction protein ZO-1 [OS=Homo sapiens]         | -7.8 | 3.3 |
| P62841   | 40S ribosomal protein S15 [OS=Homo sapiens]                            | -8.2 | 5.7 |
| P62633-1 | Cellular nucleic acid-binding protein [OS=Homo sapiens]                | -8.5 | 3.4 |
| P62633-4 | Isoform 4 of Cellular nucleic acid-binding protein [OS=Homo sapiens]   | -8.5 | 3.4 |

**Table S2. Crystallography data and refinement statistics (PDB ID: 6PVA).**

| <b>Data Collection</b>            | <b>NTMT1/1</b>          |
|-----------------------------------|-------------------------|
| $\lambda$ (Å)                     | 1.0332                  |
| Space group                       | P3 <sub>1</sub> 21      |
| a, b, c (Å)                       | 72.95, 72.95, 82.09     |
| $\alpha$ , $\beta$ , $\gamma$ (°) | 90, 90, 120             |
| Resolution (Å)*                   | 30 – 1.84 (1.89 – 1.84) |
| Completeness (%)*                 | 99.8 (97.8)             |
| Redundancy*                       | 6.5 (5.3)               |
| $R_{\text{sym}}$ †*               | 0.12 (3.3)              |
| $I / \sigma(I)$ * †               | 9.9 (0.4)               |
| CC <sub>1/2</sub>                 | 1.0 (0.14)              |
|                                   |                         |
| <b>Refinement</b>                 |                         |
| Resolution (Å)                    | 30 – 1.84               |
| No. reflections                   | 22,330                  |



|                                                |           |
|------------------------------------------------|-----------|
| R <sup>§</sup> /R <sub>free</sub> <sup>¶</sup> | 0.20/0.24 |
| <b>r.m.s. deviations</b>                       |           |
| Bonds (Å)                                      | 0.003     |
| Angles (°)                                     | 0.728     |
| No. Protein atoms                              | 1858      |
| No. Ligand atoms                               | 59        |
| No. Waters                                     | 170       |
| <b>B-factors (Å<sup>2</sup>)</b>               |           |
| Wilson B                                       | 35.45     |
| Protein                                        | 37.80     |
| Ligands                                        | 34.4      |
| Waters                                         | 42.7      |
| <b>Ramachandran Analysis<sup>‡</sup></b>       |           |
| Favored (%)                                    | 99.1      |
| Allowed (%)                                    | 0.9       |
| Outliers (%)                                   | 0         |
| PDB code                                       | 6PVA      |

<sup>†</sup>  $R_{\text{sym}} = \sum_{hkl,j} (|I_{hkl} - \langle I_{hkl} \rangle|) / \sum_{hkl,j} I_{hkl}$ , where  $\langle I_{hkl} \rangle$  is the average intensity for a set of j symmetry related reflections and  $I_{hkl}$  is the value of the intensity for a single reflection within a set of symmetry-related reflections.

<sup>§</sup>  $R \text{ factor} = \sum_{hkl} (|F_o| - |F_c|) / \sum_{hkl} F_o$  where  $F_o$  is the observed structure factor amplitude and  $F_c$  is the calculated structure factor amplitude.

<sup>¶</sup>  $R_{\text{free}} = \sum_{hkl,T} (|F_o| - |F_c|) / \sum_{hkl,T} F_o$ , where a test set, T (5% of the data), is omitted from the refinement.

<sup>‡</sup> Performed using Molprobity within PHENIX.

\* Indicates statistics for last resolution shell shown in parenthesis.
